# Supplementary material for: Beneficial Effects of Asparagus officinalis Extract Supplementation on Muscle Mass and Strength following Resistance Training and Detraining in Healthy Males
Source: MDPI journal article supplement (doi:10.3390/sports11090175), 2023-09-05
Supplement: s1 [file s1]

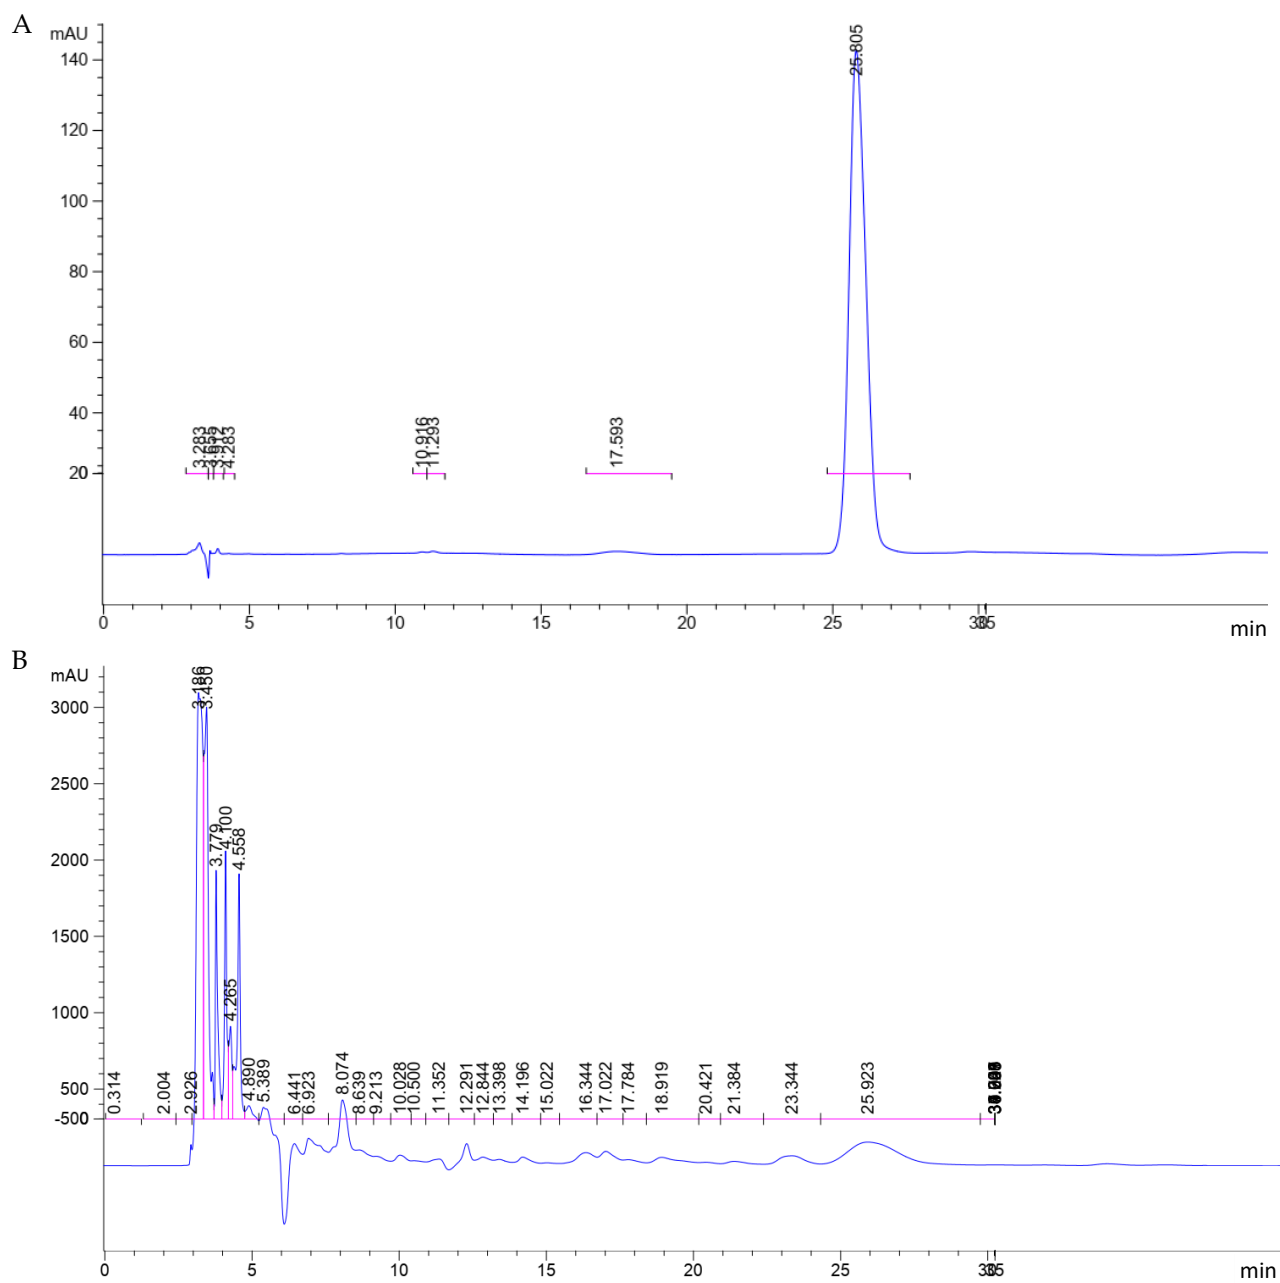

**Figure S1.** HPLC chromatogram of the standard solution of 20-hydroxycdysone (250  $\mu\text{g}/\mu\text{L}$ ) with a retention time of 25.805 min (A) and the hard-stem by-product of *A. officinalis* at a retention time of 25.923 min (B).

Table S1. Total daily energy intake at baseline, training, and detraining for 12 weeks in the PLA and 20E groups.

|                               | PLA ( <i>n</i> = 10) |              |              | 20E ( <i>n</i> = 10) |              |              | Time effect<br>$\eta^2$ ( <i>p</i> -value) | Group×<br>Time<br>interaction<br>$\eta^2$ ( <i>p</i> -value) |
|-------------------------------|----------------------|--------------|--------------|----------------------|--------------|--------------|--------------------------------------------|--------------------------------------------------------------|
|                               | baseline             | TR-12        | DeTR-12      | baseline             | TR-12        | DeTR-12      |                                            |                                                              |
| Energy intake (Kcal/day)      | 1877.7±188.6         | 1961.5±138.7 | 1936.2±223.1 | 1881.0±317.9         | 1848.6±229.1 | 1829.4±219.6 | 0.016 (0.747)                              | 0.082 (0.213)                                                |
| Energy intake (Kcal/day/kgBW) | 26.0±4.1             | 26.6±3.4     | 26.9±4.2     | 26.9±5.1             | 26.1±4.3     | 25.7±3.9     | 0.002 (0.968)                              | 0.110 (0.124)                                                |
| CHO (g/day)                   | 235.5±22.11          | 248.3±14.5   | 243.0±30.3   | 235.0±39.2           | 233.2±29.9   | 231.3±27.0   | 0.038 (0.497)                              | 0.080 (0.223)                                                |
| CHO (g/kgBW)                  | 3.6±0.5              | 3.4±0.4      | 3.4±0.6      | 3.4±0.6              | 3.3±0.5      | 3.3±0.5      | 0.005 (0.910)                              | 0.099 (0.154)                                                |
| CHO (Kcal)                    | 942.05±88.5          | 993.3±57.8   | 972.0±121.0  | 942.1±156.6          | 932.8±119.7  | 925.0±107.8  | 0.038 (0.497)                              | 0.080 (0.223)                                                |
| CHO (E%)                      | 50.2±1.9             | 50.7±1.4     | 50.17±1.6    | 50.1±0.9             | 50.5±1.2     | 50.6±0.7     | 0.022 (0.676)                              | 0.017 (0.739)                                                |
| PRO (g/day)                   | 88.8±17.1            | 97.5±9.6     | 97.8±22.6    | 89.6±17.5            | 87.5±12.5    | 86.7±12.3    | 0.035 (0.527)                              | 0.105 (0.137)                                                |
| PRO (g/kgBW)                  | 1.2±0.3              | 1.3±0.2      | 1.3±0.3      | 1.3±0.3              | 1.2±0.3      | 1.2±0.2      | 0.011 (0.824)                              | 0.100 (0.149)                                                |
| PRO (Kcal)                    | 355.8±68.5           | 384.0±38.4   | 380.2±76.8   | 358.4±70.0           | 350.2±50.0   | 346.8±49.2   | 0.024 (0.642)                              | 0.100 (0.174)                                                |
| PRO (E%)                      | 18.8±2.1             | 19.9±0.7     | 19.5±2.1     | 19.0±1.0             | 19.0±2.0     | 18.9±1.2     | 0.034 (0.538)                              | 0.036 (0.512)                                                |
| FAT (g/day)                   | 64.4±6.1             | 64.3±6.0     | 64.9±4.4     | 64.5±10.7            | 62.9±9.0     | 61.9±8.1     | 0.024 (0.644)                              | 0.042 (0.465)                                                |
| FAT (g/kgBW)                  | 0.9±0.1              | 0.9±0.1      | 1.0±0.1      | 0.9±0.2              | 0.9±0.2      | 0.9±0.1      | 0.065 (0.299)                              | 0.109 (0.126)                                                |
| FAT (Kcal)                    | 579.8±55.0           | 578.3±54.1   | 584.0±39.5   | 580.4±96.2           | 565.63±81.1  | 557.5±73.2   | 0.024 (0.644)                              | 0.042 (0.465)                                                |
| FAT (E%)                      | 30.9±1.5             | 29.5±1.2     | 30.3±1.7     | 30.9±1.0             | 30.6±1.5     | 30.5±1.4     | 0.178 (0.029)                              | 0.091 (0.181)                                                |

Note: Data are shown as means ± SD. PLA, placebo group; 20E, 20-hydroxyecdysone supplementation group; TR-12, after 12 weeks of training; DeTR-6, after 6 weeks of detraining; DeTR-12, after 12 weeks of detraining; CHO, carbohydrate; PRO, protein; FAT, fat.
